# Supplementary material for: Novel parietal epithelial cell subpopulations contribute to focal segmental glomerulosclerosis and glomerular tip lesions
Source: PubMed Central journal article supplement — Kidney Int. Author manuscript; Available in PMC 2020 Jul 1. (PMC7292612; doi:10.1016/j.kint.2019.01.037), 2019-02-27
Supplement: NIHMS1587676-supplement-Supplementary_Figure_1.pdf [file NIHMS1587676-supplement-Supplementary_Figure_1.pdf]

# supplementary Figure 1

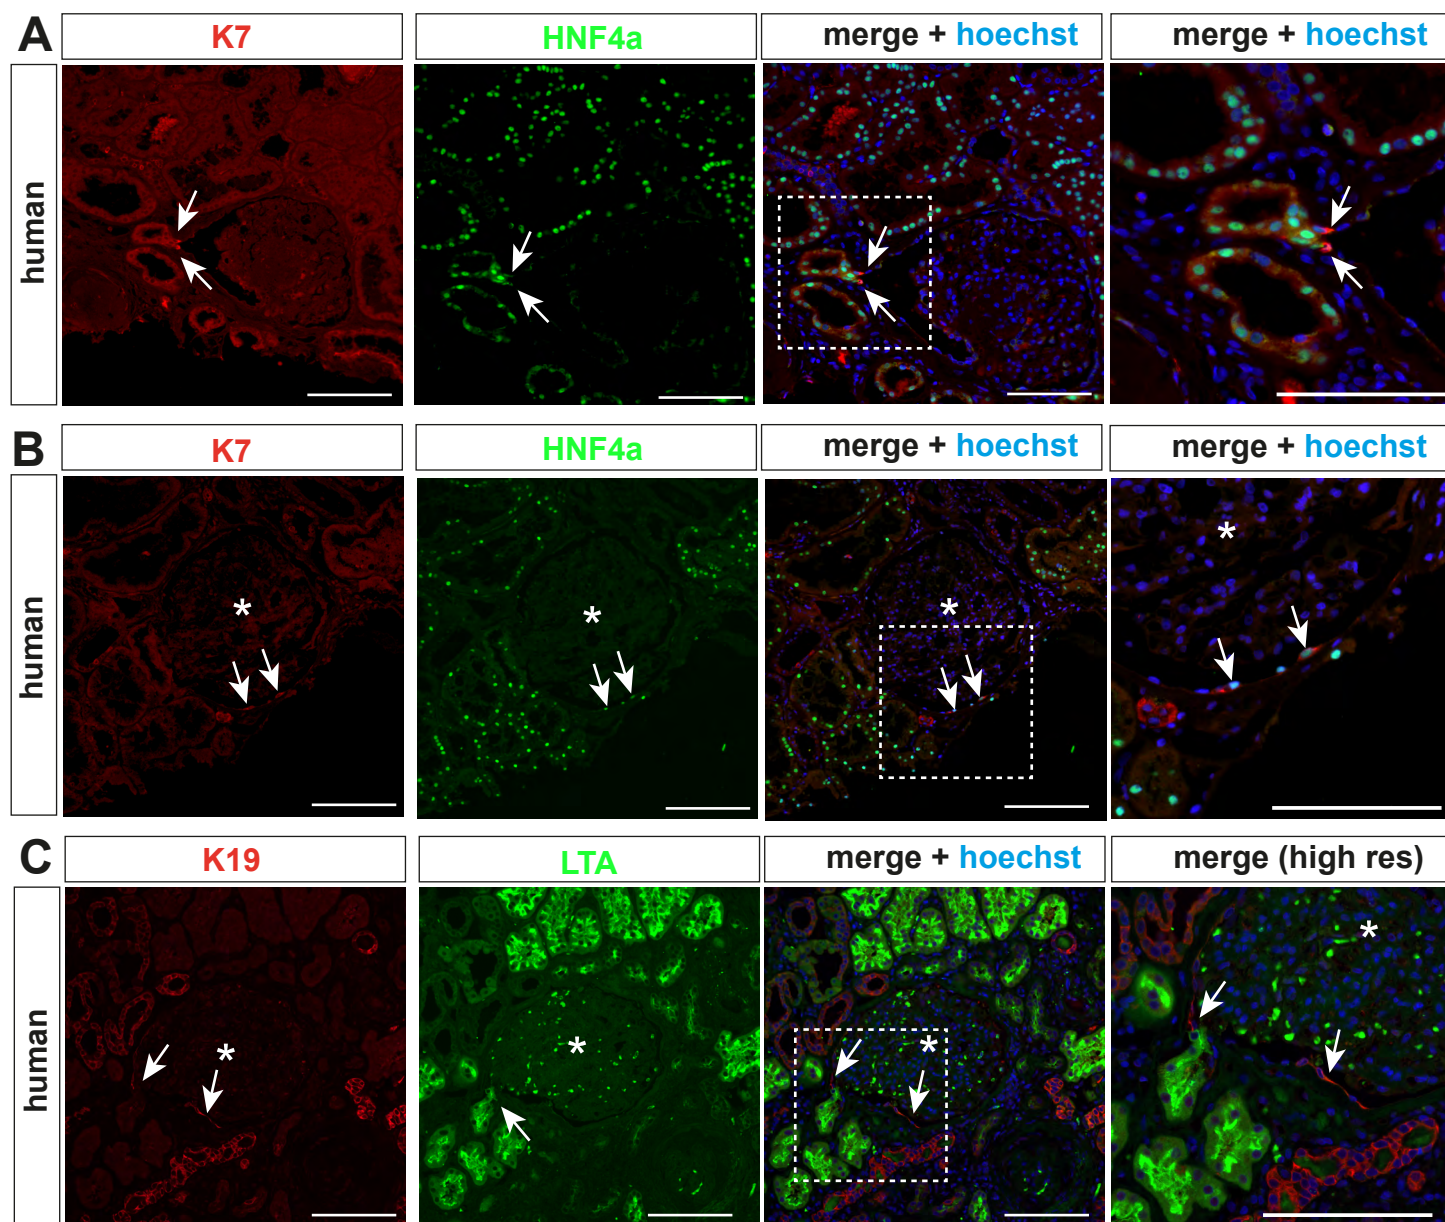

## Supplementary Figure 1

### ***STC markers and parietal epithelial subpopulations***

**A-C.** Immunofluorescent staining for K7, K19, HNF4alpha and LTA. **A.** HNF4alpha marks proximal tubular cells, panel in A. Note that K7 positive cells were located in conjunction to HNF4alpha at the tubular-glomerular junction. **B.** HNF4alpha positive cells could be detected on Bowmann's capsule. Note that K7 positive cells were located in conjunction to HNF4alpha positive cells. **C.** K19 positive cells can be detected in direct conjunction to LTA positive tubular cells (arrow in C). Scale bar 100  $\mu\text{m}$ .
