# Supplementary material for: Novel parietal epithelial cell subpopulations contribute to focal segmental glomerulosclerosis and glomerular tip lesions
Source: PubMed Central journal article supplement — Kidney Int. Author manuscript; Available in PMC 2020 Jul 1. (PMC7292612; doi:10.1016/j.kint.2019.01.037), 2019-02-27
Supplement: NIHMS1587676-supplement-Supplementary_Figure_2.pdf [file NIHMS1587676-supplement-Supplementary_Figure_2.pdf]

# supplementary Figure 2

**A** schematic publ. nomenclature

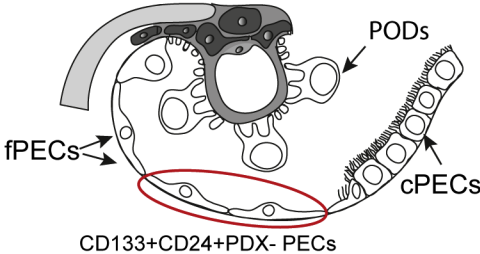

**B** published marker expression

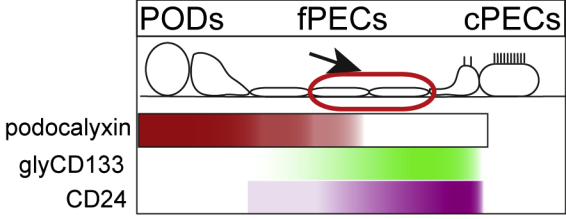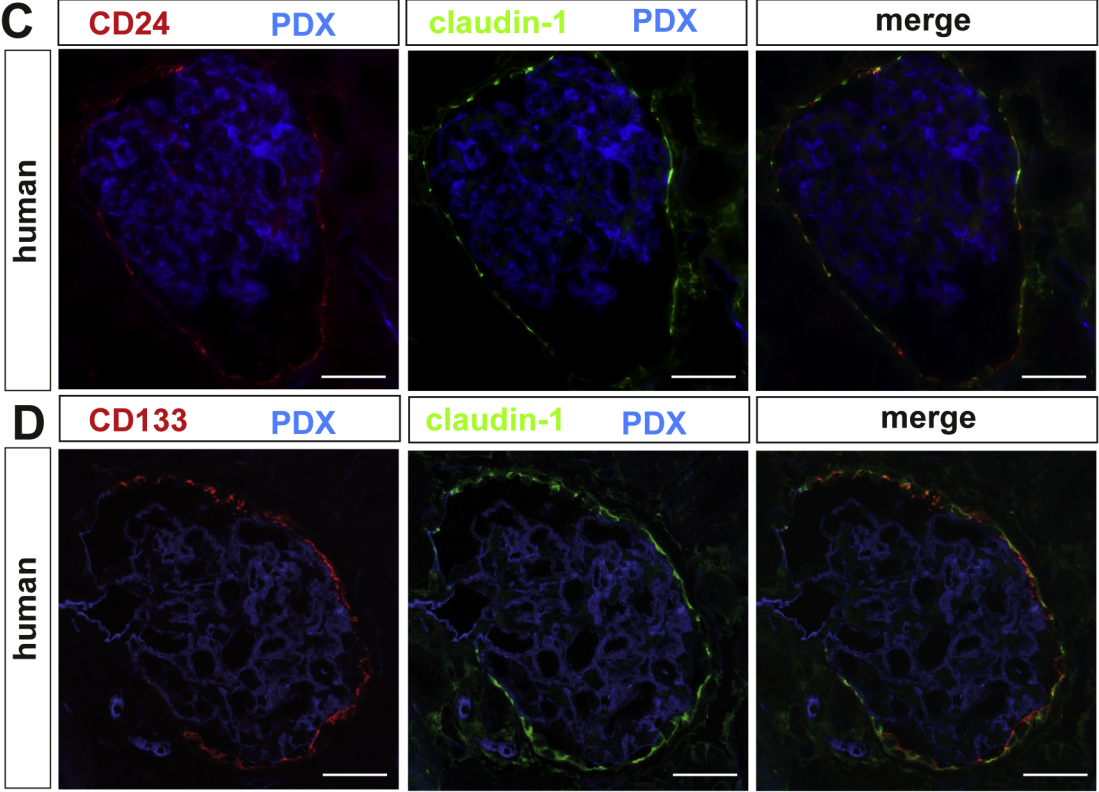

analyzed in 238 glomeruli (n=6 pat.)

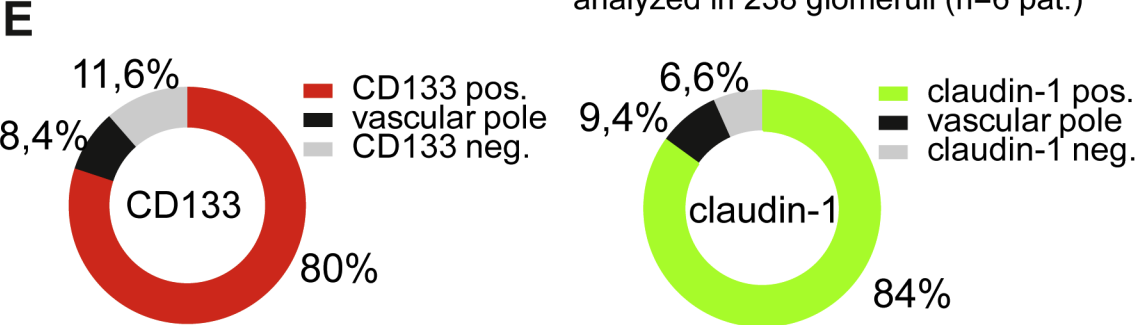

## **Supplementary Figure 2**

### **Analysis of CD24/glyCD133 on Bowman's capsule.**

**A-B.** Schematic of the nomenclature. PODs, podocytes; CD133+CD24+PDX- PECs, presumptive localization of renal progenitors (red circle), cPEC; cuboidal PEC; PDX, podocalyxin. **B.** According to previous reports, a graded expression of progenitor markers into podocyte markers (PDX) indicated continuous podocyte regeneration.

**C-D.** Representative immunofluorescent co-stainings of podocalyxin (podocytes), claudin-1 (fPECs) and either CD24 or glyCD133. Scale bar 100  $\mu$ m. **E.** Expression of glyCD133 and claudin 1 as percentage of the circumference of Bowman's capsule in normal human kidney (total of 238 glomeruli in 6 different nephrectomy specimens).
