# Supplementary material for: Novel parietal epithelial cell subpopulations contribute to focal segmental glomerulosclerosis and glomerular tip lesions
Source: PubMed Central journal article supplement — Kidney Int. Author manuscript; Available in PMC 2020 Jul 1. (PMC7292612; doi:10.1016/j.kint.2019.01.037), 2019-02-27
Supplement: NIHMS1587676-supplement-Supplementary_Figure_3.pdf [file NIHMS1587676-supplement-Supplementary_Figure_3.pdf]

# supplementary Figure 3

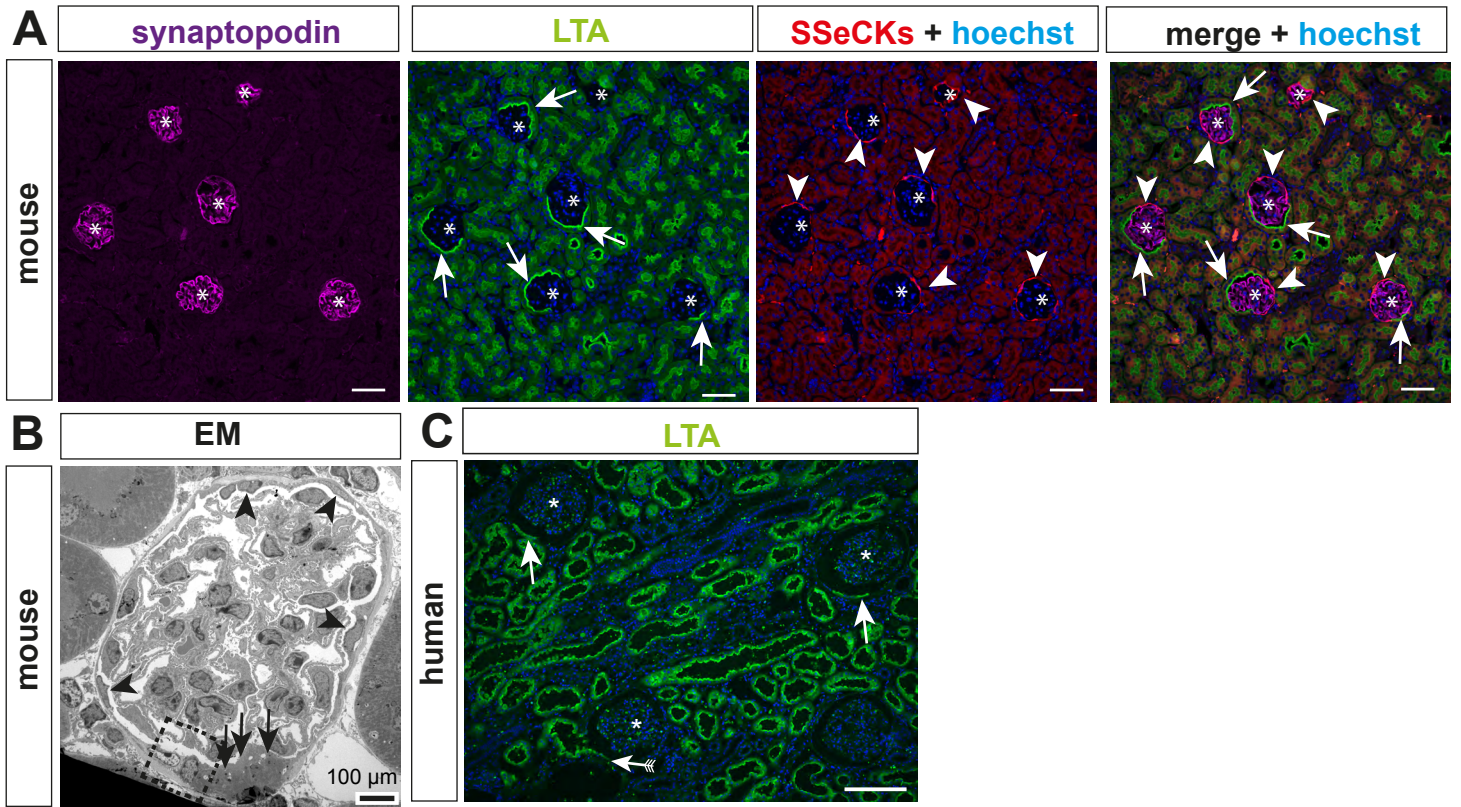

### **Supplementary Figure 3**

#### **Parietal epithelial cell subpopulations in mice and humans**

**A.** Immunofluorescent staining for SSeCKS (fPECs), LTA (cPECs) and synaptopodin (podocytes). **B.** EM overview of Bowman's capsule in mice. Insert marks image selection for Figure 1L. CPECs form a brush-border at the apical membrane (arrows). FPECs are marked with arrowheads. Scale bar 100  $\mu$ m. **C.** Normal human kidney section from tumor nephrectomies stained with LTA (cPECs). Note that three glomeruli show LTA positive cells on Bowman's capsule (arrows) close to the tubular pole (arrow with tails). Glomeruli are marked by asterisks.
