# Supplementary material for: Novel parietal epithelial cell subpopulations contribute to focal segmental glomerulosclerosis and glomerular tip lesions
Source: PubMed Central journal article supplement — Kidney Int. Author manuscript; Available in PMC 2020 Jul 1. (PMC7292612; doi:10.1016/j.kint.2019.01.037), 2019-02-27
Supplement: NIHMS1587676-supplement-Supplementary_Figure_4.pdf [file NIHMS1587676-supplement-Supplementary_Figure_4.pdf]

# supplementary Figure 4

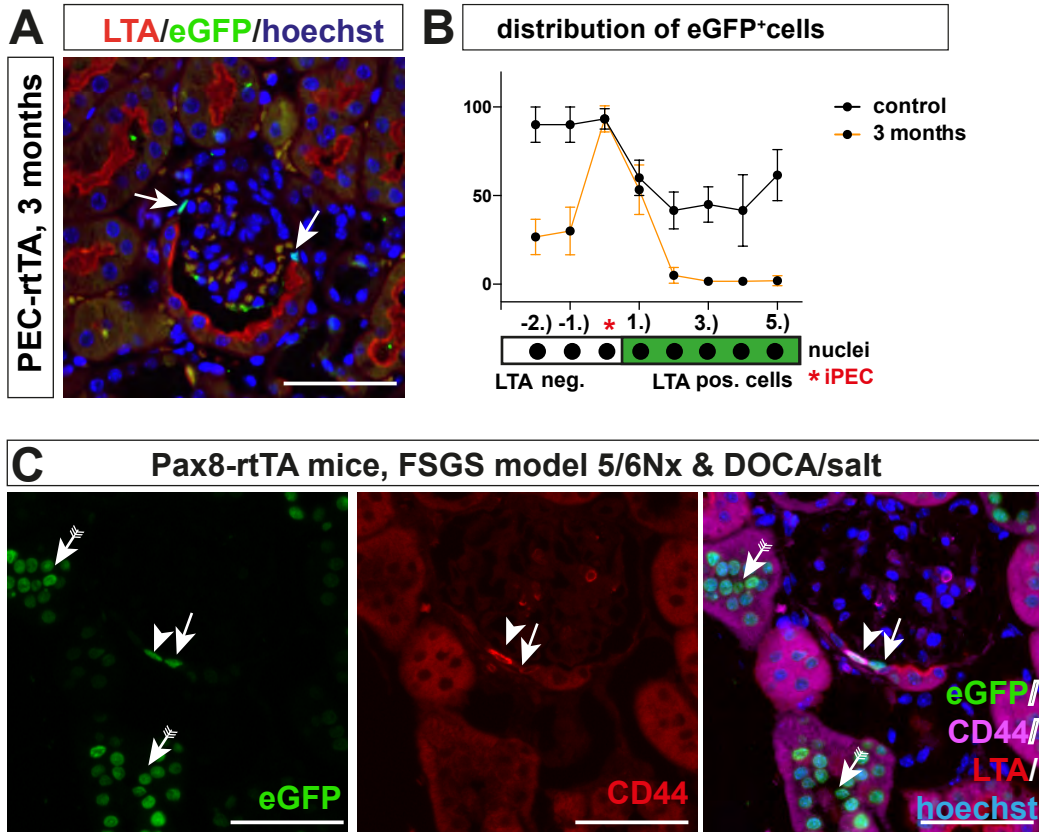

#### **Supplementary Figure 4**

**A.** In the PEC-rtTA mouse after a pulse chase period of 3 months, the histone-eGFP metabolic label persisted preferentially in iPECs (arrows). Scale bars, 50  $\mu\text{m}$ . **B.** Analysis of eGFP positive nuclei on Bowman's capsule in aged PEC-rtTA mice (n=5, ANOVA,  $P < 0.001$ ). **C.** In Pax8-rtTA mice subjected to 5/6 nephrectomy and DOCA&salt treatment to induce FSGS lesions, CD44 was expressed in the eGFP-positive presumptive iPECs (arrowhead). In the example shown, the adjacent cPEC has also retained its GFP-histone labelling but does not express activation marker CD44 (arrow). Labelling within tubular cells is marked by arrows with tails.
