# Supplementary material for: Novel parietal epithelial cell subpopulations contribute to focal segmental glomerulosclerosis and glomerular tip lesions
Source: PubMed Central journal article supplement — Kidney Int. Author manuscript; Available in PMC 2020 Jul 1. (PMC7292612; doi:10.1016/j.kint.2019.01.037), 2019-02-27
Supplement: NIHMS1587676-supplement-Supplementary_Figure_5.pdf [file NIHMS1587676-supplement-Supplementary_Figure_5.pdf]

# supplementary Figure 5

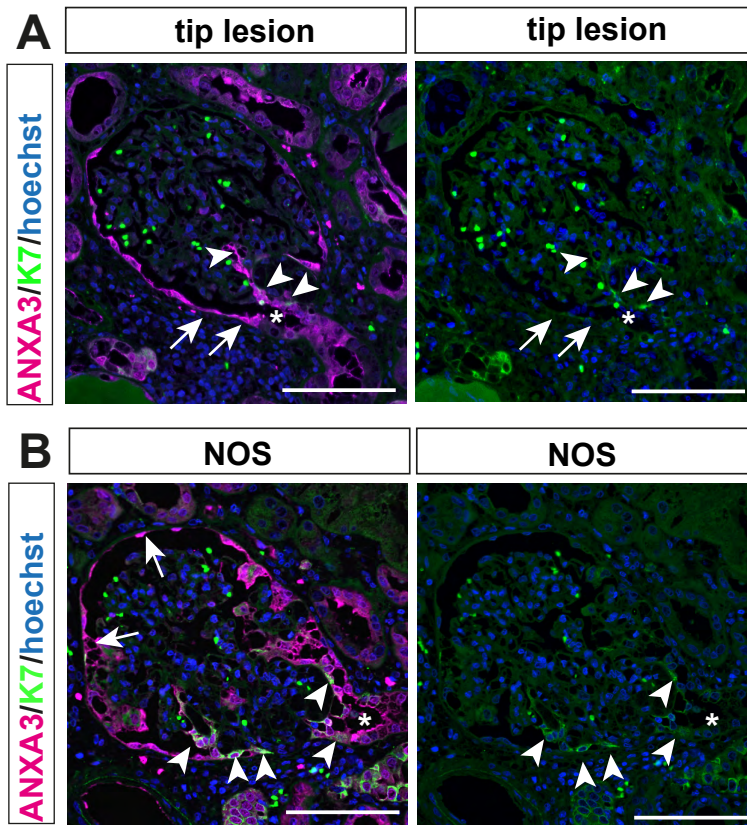

## **Supplementary Figure 5**

### **K7 positive cells (presumptive intermediate PECs) within FSGS lesions**

**A.** Examples of a tip lesion with little keratin 7 (K7) expression (arrow heads). **B.** Example of a lesion not otherwise specified (NOS) containing a mixture of K7 positive (arrow heads) or negative (arrows) adhesions/lesions. Immunofluorescent co-stainings for the global PEC marker ANXA3 and K7. Scale bar 100  $\mu\text{m}$ .
