# Supplementary material for: Novel parietal epithelial cell subpopulations contribute to focal segmental glomerulosclerosis and glomerular tip lesions
Source: PubMed Central journal article supplement — Kidney Int. Author manuscript; Available in PMC 2020 Jul 1. (PMC7292612; doi:10.1016/j.kint.2019.01.037), 2019-02-27
Supplement: NIHMS1587676-supplement-Supplementary_Table_1.pdf [file NIHMS1587676-supplement-Supplementary_Table_1.pdf]

**Supplementary Table 1. Demographics of patients classified with FSGS**

| Nijmegen cohort, n=23   |             |                                                   |
|-------------------------|-------------|---------------------------------------------------|
| Subject                 | Age, gender | Diagnosis                                         |
| 1                       | 43, female  | Recurrent FSGS, Tip variant                       |
| 2                       | 20, male    | MCD, Tip lesions                                  |
| 3                       | 35, male    | FSGS, Tip variant                                 |
| 4                       | 37, male    | FSGS, Tip variant                                 |
| 5                       | 67, male    | FSGS, NOS variant                                 |
| 6                       | 60, female  | FSGS, Tip variant                                 |
| 7                       | 64, male    | FSGS, Tip variant                                 |
| 8                       | 56, male    | FSGS, Tip variant                                 |
| 9                       | 68, male    | FSGS, NOS variant                                 |
| 10                      | 16, female  | FSGS, Tip variant                                 |
| 11                      | 41, male    | FSGS, Tip variant                                 |
| 12                      | 67, male    | Secondary FSGS, Tip variant and perihilar lesions |
| 13                      | 60, male    | FSGS, Tip variant                                 |
| 14                      | 63, male    | FSGS, Tip variant                                 |
| 15                      | 21, male    | FSGS, Tip variant                                 |
| 16                      | 40, male    | FSGS, Tip variant                                 |
| 17                      | 69, female  | FSGS, Tip variant                                 |
| 18                      | 61, male    | FSGS, Tip variant                                 |
| 19                      | 62, male    | FSGS, Tip variant                                 |
| 20                      | 16, male    | FSGS, Tip variant                                 |
| 21                      | 49, male    | FSGS, NOS variant                                 |
| 22                      | 63, female  | FSGS, Tip variant                                 |
| 23                      | 62, male    | FSGS, Tip variant                                 |
| Vanderbilt cohort, n=12 |             |                                                   |
| 24                      | 28, female  | FSGS, Tip variant                                 |
| 25                      | 66, male    | FSGS, Tip variant                                 |
| 26                      | 84, male    | FSGS, Tip variant                                 |
| 27                      | 27, female  | FSGS, collapsing variant                          |
| 28                      | 88, female  | FSGS, collapsing variant                          |
| 29                      | 57, male    | FSGS, collapsing variant                          |
| 30                      | 25, male    | FSGS, perihilar variant                           |

|                                          |                                                        |                            |
|------------------------------------------|--------------------------------------------------------|----------------------------|
| <b>31</b>                                | 69, male                                               | FSGS, perihilar variant    |
| <b>32</b>                                | 19, female                                             | FSGS, perihilar variant    |
| <b>33</b>                                | 41, male                                               | Pauci-Immune crescentic GN |
| <b>34</b>                                | 78, female                                             | Pauci-Immune crescentic GN |
| <b>35</b>                                | 56, male                                               | Pauci-Immune crescentic GN |
| <b>total</b>                             | <b>Mean age years 51.34 , female n= 10, male n= 25</b> |                            |
| FSGS: focal segmental glomerulosclerosis |                                                        |                            |
