# Supplementary material for: Novel parietal epithelial cell subpopulations contribute to focal segmental glomerulosclerosis and glomerular tip lesions
Source: PubMed Central journal article supplement — Kidney Int. Author manuscript; Available in PMC 2020 Jul 1. (PMC7292612; doi:10.1016/j.kint.2019.01.037), 2019-02-27
Supplement: NIHMS1587676-supplement-Supplementary_Table_2.pdf [file NIHMS1587676-supplement-Supplementary_Table_2.pdf]

**Supplementary Table 2. Demographics of patients with kidney tumor nephrectomies**

Eschweiler-Aachen cohort, n=20

| <b>Subject</b> | <b>Age, gender</b>                                         | <b>Diagnosis</b>               |
|----------------|------------------------------------------------------------|--------------------------------|
| 1              | 80, male                                                   | Urothelial carcinoma           |
| 2              | 74, male                                                   | Papillary Urothelial carcinoma |
| 3              | 51, male                                                   | Papillary Kidney carcinoma     |
| 4              | 80, male                                                   | Urothelial carcinoma           |
| 5              | 77, male                                                   | Clear cell kidney cancer       |
| 6              | 59, male                                                   | Clear cell kidney cancer       |
| 7              | 68, male                                                   | Clear cell kidney cancer       |
| 8              | 70, male                                                   | Renal oncocytoma               |
| 9              | 63, male                                                   | Clear cell kidney cancer       |
| 10             | 47, male                                                   | Clear cell kidney cancer       |
| 11             | 67, female                                                 | Clear cell kidney cancer       |
| 12             | 53, female                                                 | Clear cell kidney cancer       |
| 13             | 76, female                                                 | Clear cell kidney cancer       |
| 14             | 72, female                                                 | Leiomyosarcoma of the kidney   |
| 15             | 59, female                                                 | Clear cell kidney cancer       |
| 16             | 74, female                                                 | Papillary Urothelial carcinoma |
| 17             | 74, female                                                 | Clear cell kidney cancer       |
| 18             | 79, female                                                 | Clear cell kidney cancer       |
| 19             | 63, female                                                 | Clear cell kidney cancer       |
| 20             | 68, female                                                 | Clear cell kidney cancer       |
| <b>total</b>   | female n=10 (avg. 68,5 years), male n=10 (avg. 66,9 years) |                                |
